# Supplementary material
Source: PubMed Central journal article supplement (PMC7440397)

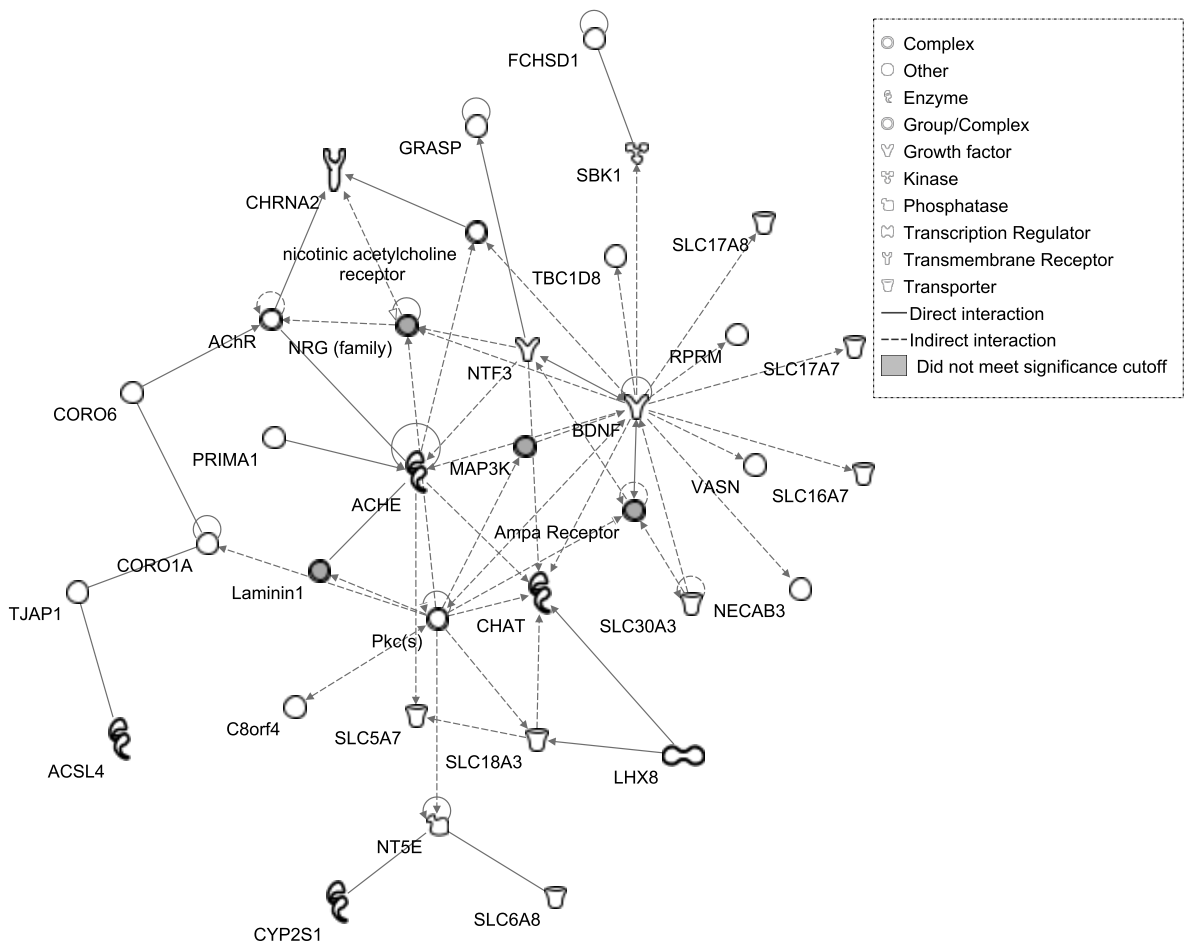

Supplement: NIHMS1604077-supplement-13.pdf [file NIHMS1604077-supplement-13.pdf]
